# Supplementary material for: The timescales of global surface-ocean connectivity
Source: PubMed Central journal article supplement (PMC4838858; doi:10.1038/ncomms11239), 2016-04-19
Supplement: ncomms11239-s1.pdf [file ncomms11239-s1.pdf]

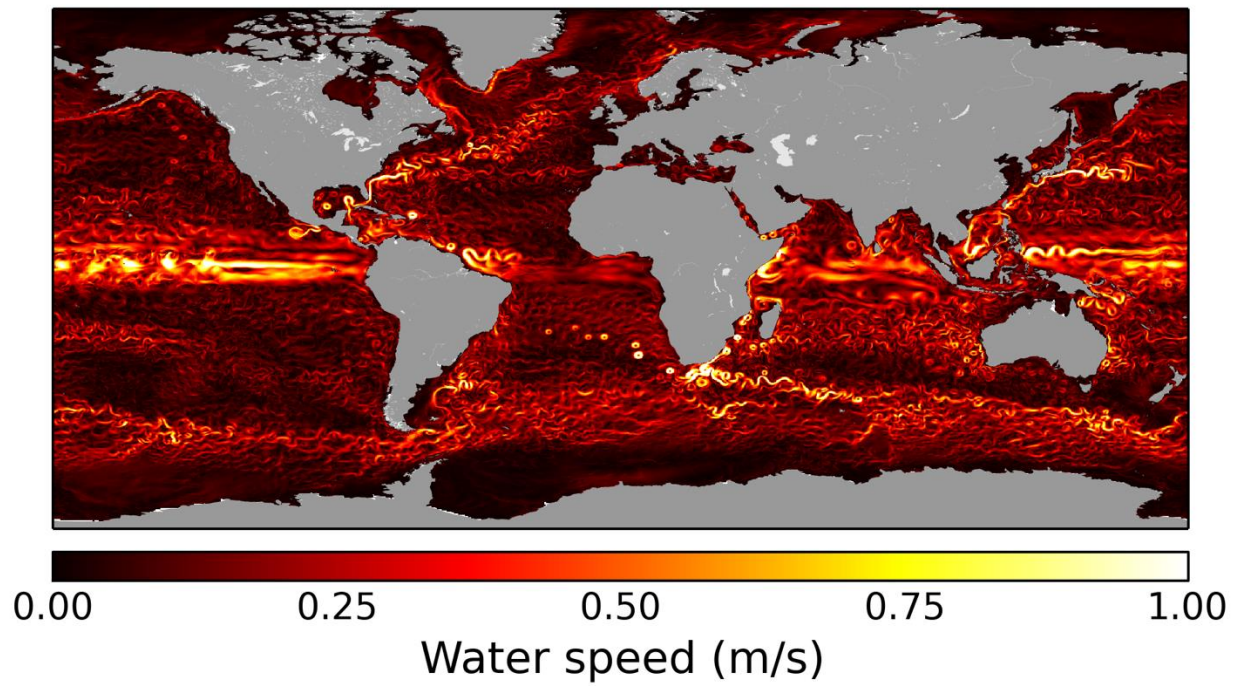

**Supplementary Fig. 1: ECCO2 Velocities Jan 1st 2000**

A snapshot of the ECCO2 surface velocity field (m/s) from January 1st, 2000. The model has global coverage, and a  $\frac{1}{4}^\circ$  horizontal resolution. Eddies and other meso-scale features that affect dispersal in the ocean are represented in the model.

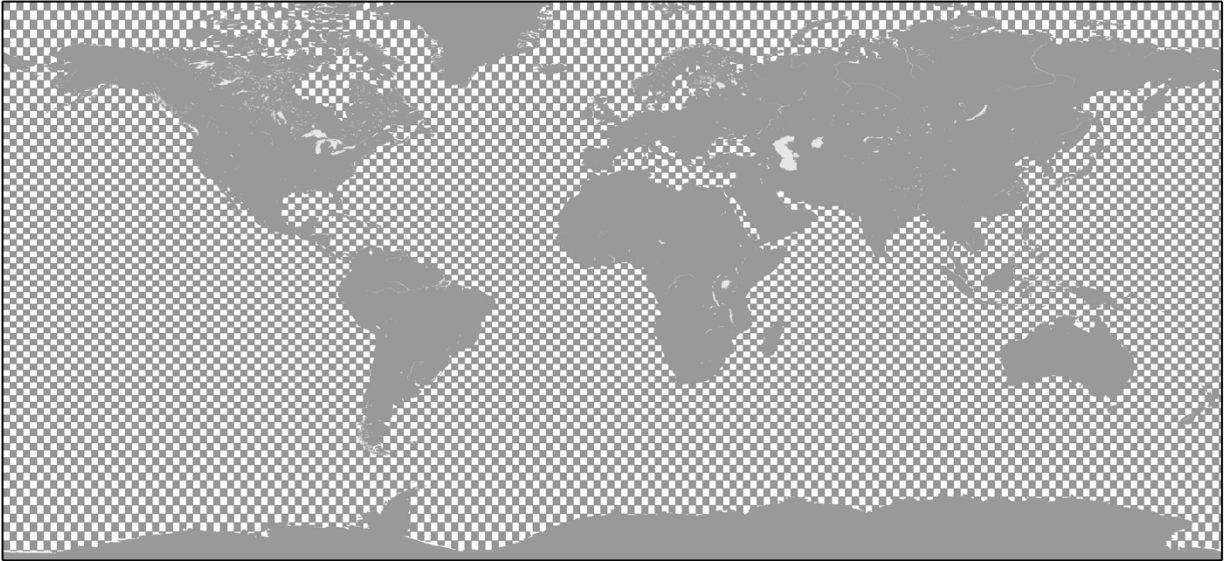

**Supplementary Fig. 2: Connectivity patches**

The white and grey checkerboard over ocean areas identifies the patches used to calculate surface connectivity. Each patch is approximately  $2^\circ \times 2^\circ$ .

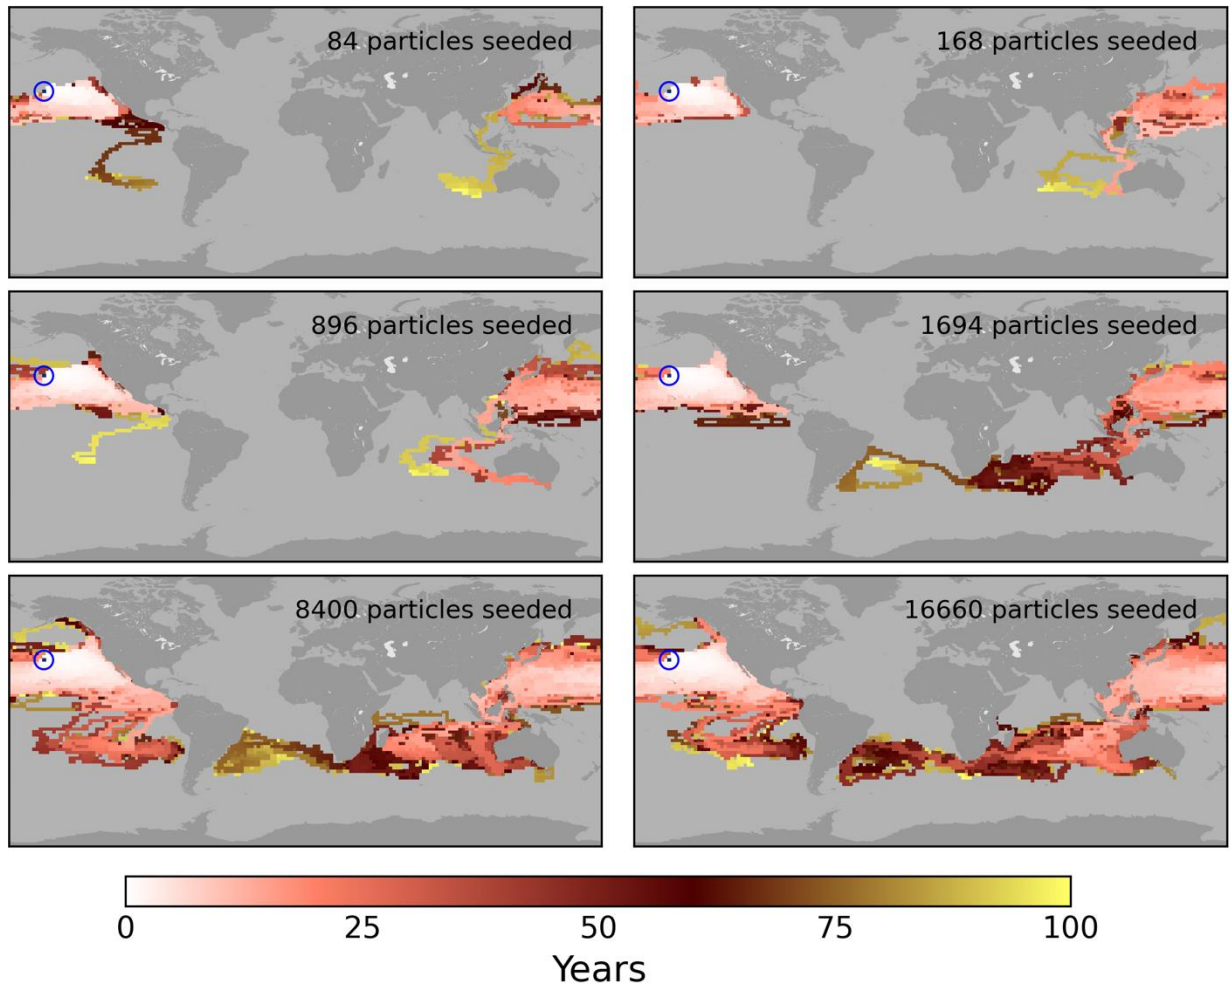

**Supplementary Fig. 3: Effect of Seeding density on distance**

Sensitivity test for the number of seeded particles. Minimum connection times from a source patch in the north Pacific are estimated using simulations seeded with different numbers of Lagrangian particles.

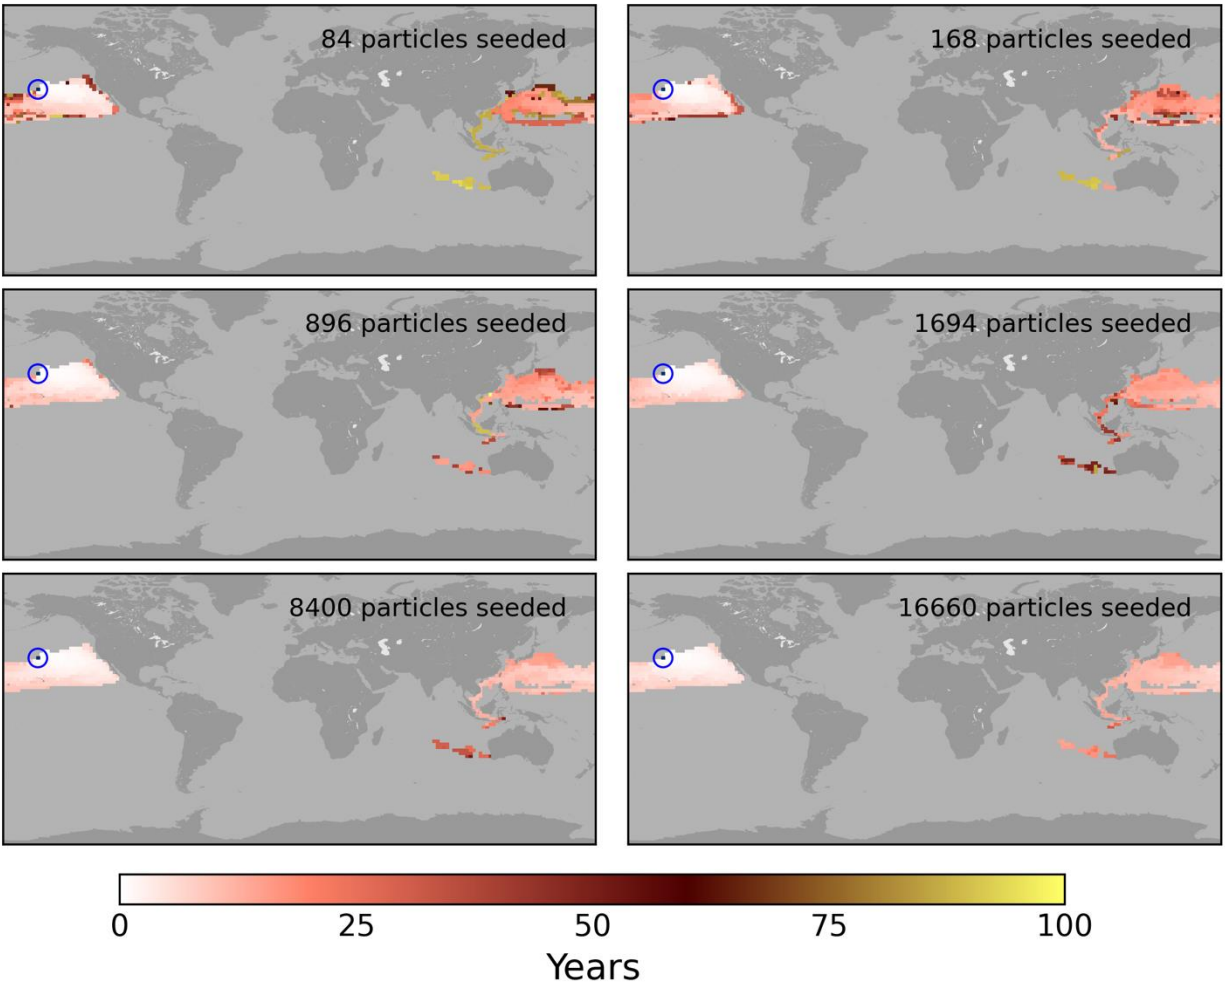

**Supplementary Fig. 4: Effect of Seeding density on time**

Sensitivity test for the number of seeded particles. Minimum connection times from a source patch in the north Pacific are estimated using simulations with a range of Lagrangian particles. Here, only patches reached in **all** particle seeding simulations are shown (hence the contraction in range from Supplementary Fig. 3).

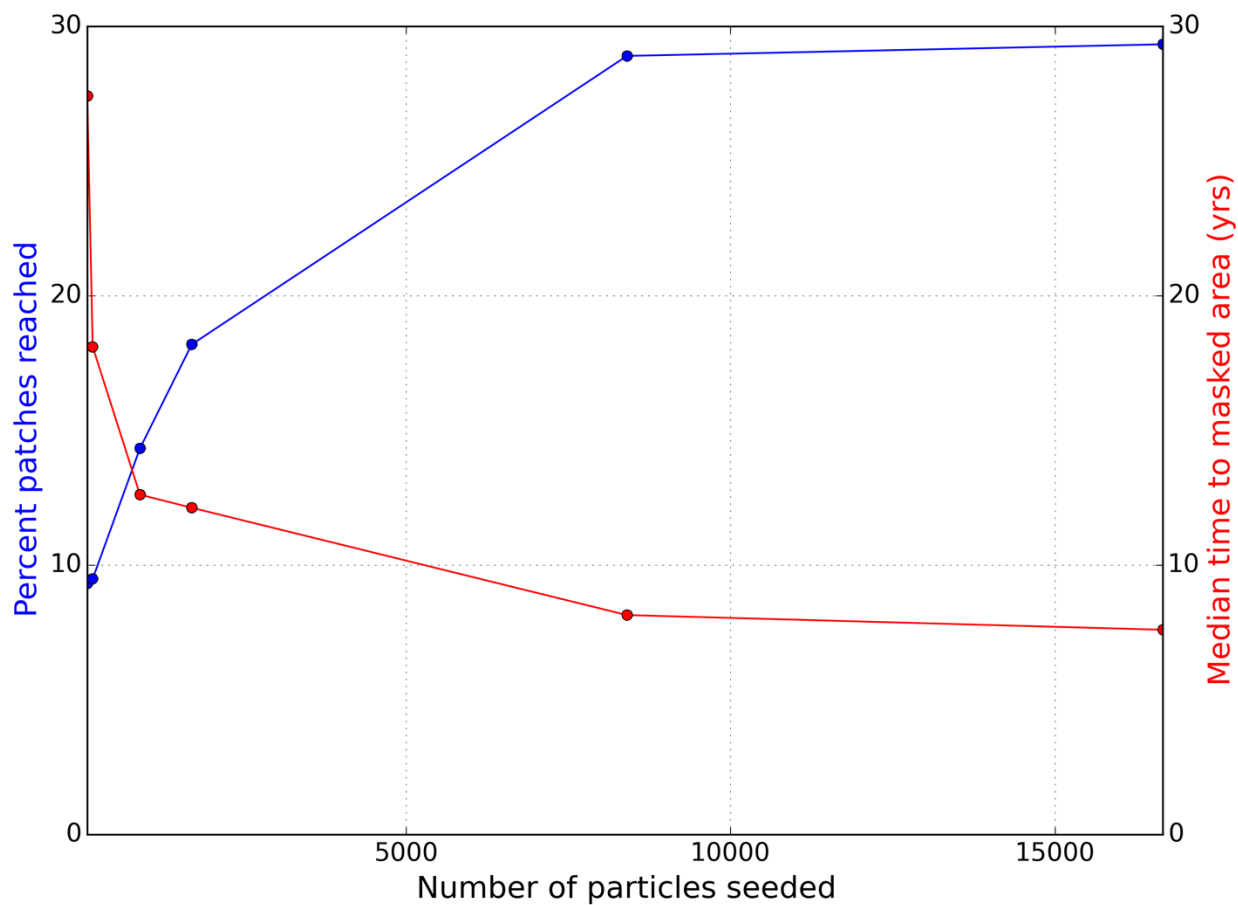

**Supplementary Fig. 5: Seeding density vs time and patches reached**

The fraction of total number connectivity patches, over the global ocean, reached as a function of number of particles released (blue line) and the median minimum connection time from the source patch in the north Atlantic to the "masked patches" -- those patches reached in all particle seeding simulations (i.e., corresponding to those in Supplementary Fig. 4).

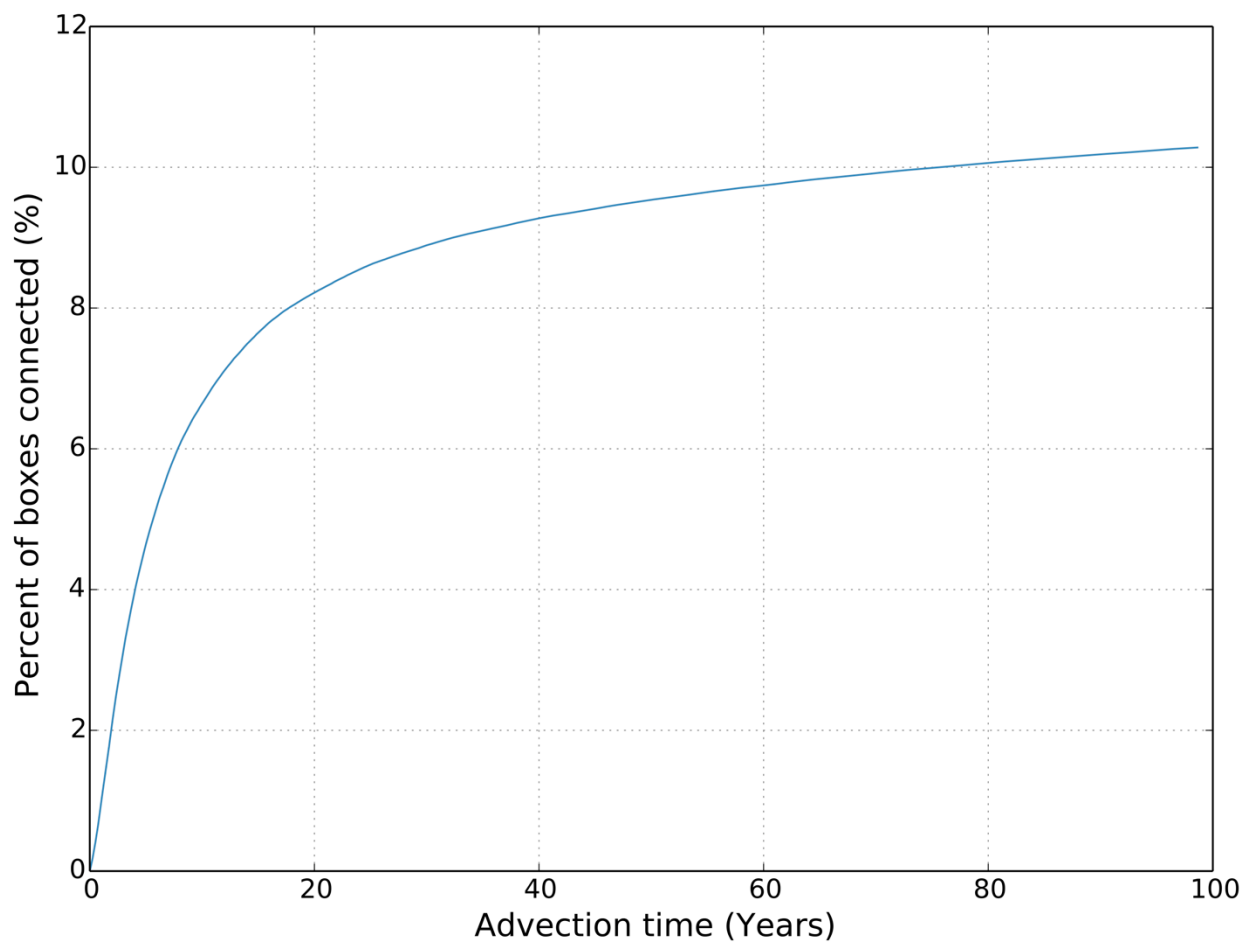

**Supplementary Fig. 6: Connected patches vs time**

Fraction of the total number of patches connected as a function of advection time. The relationship is saturating, indicating marginal gains by running the Lagrangian particle tracking for longer integration periods.
